# Supplementary figures and images for: Comprehensive Annotation of Bidirectional Promoters Identifies Co-Regulation among Breast and Ovarian Cancer Genes
Source: PLOS journal article supplement (doi:10.1371/journal.pcbi.0030072), 2007-04-18

# Independent verification of bidirectional promoters by Riken CAGE data

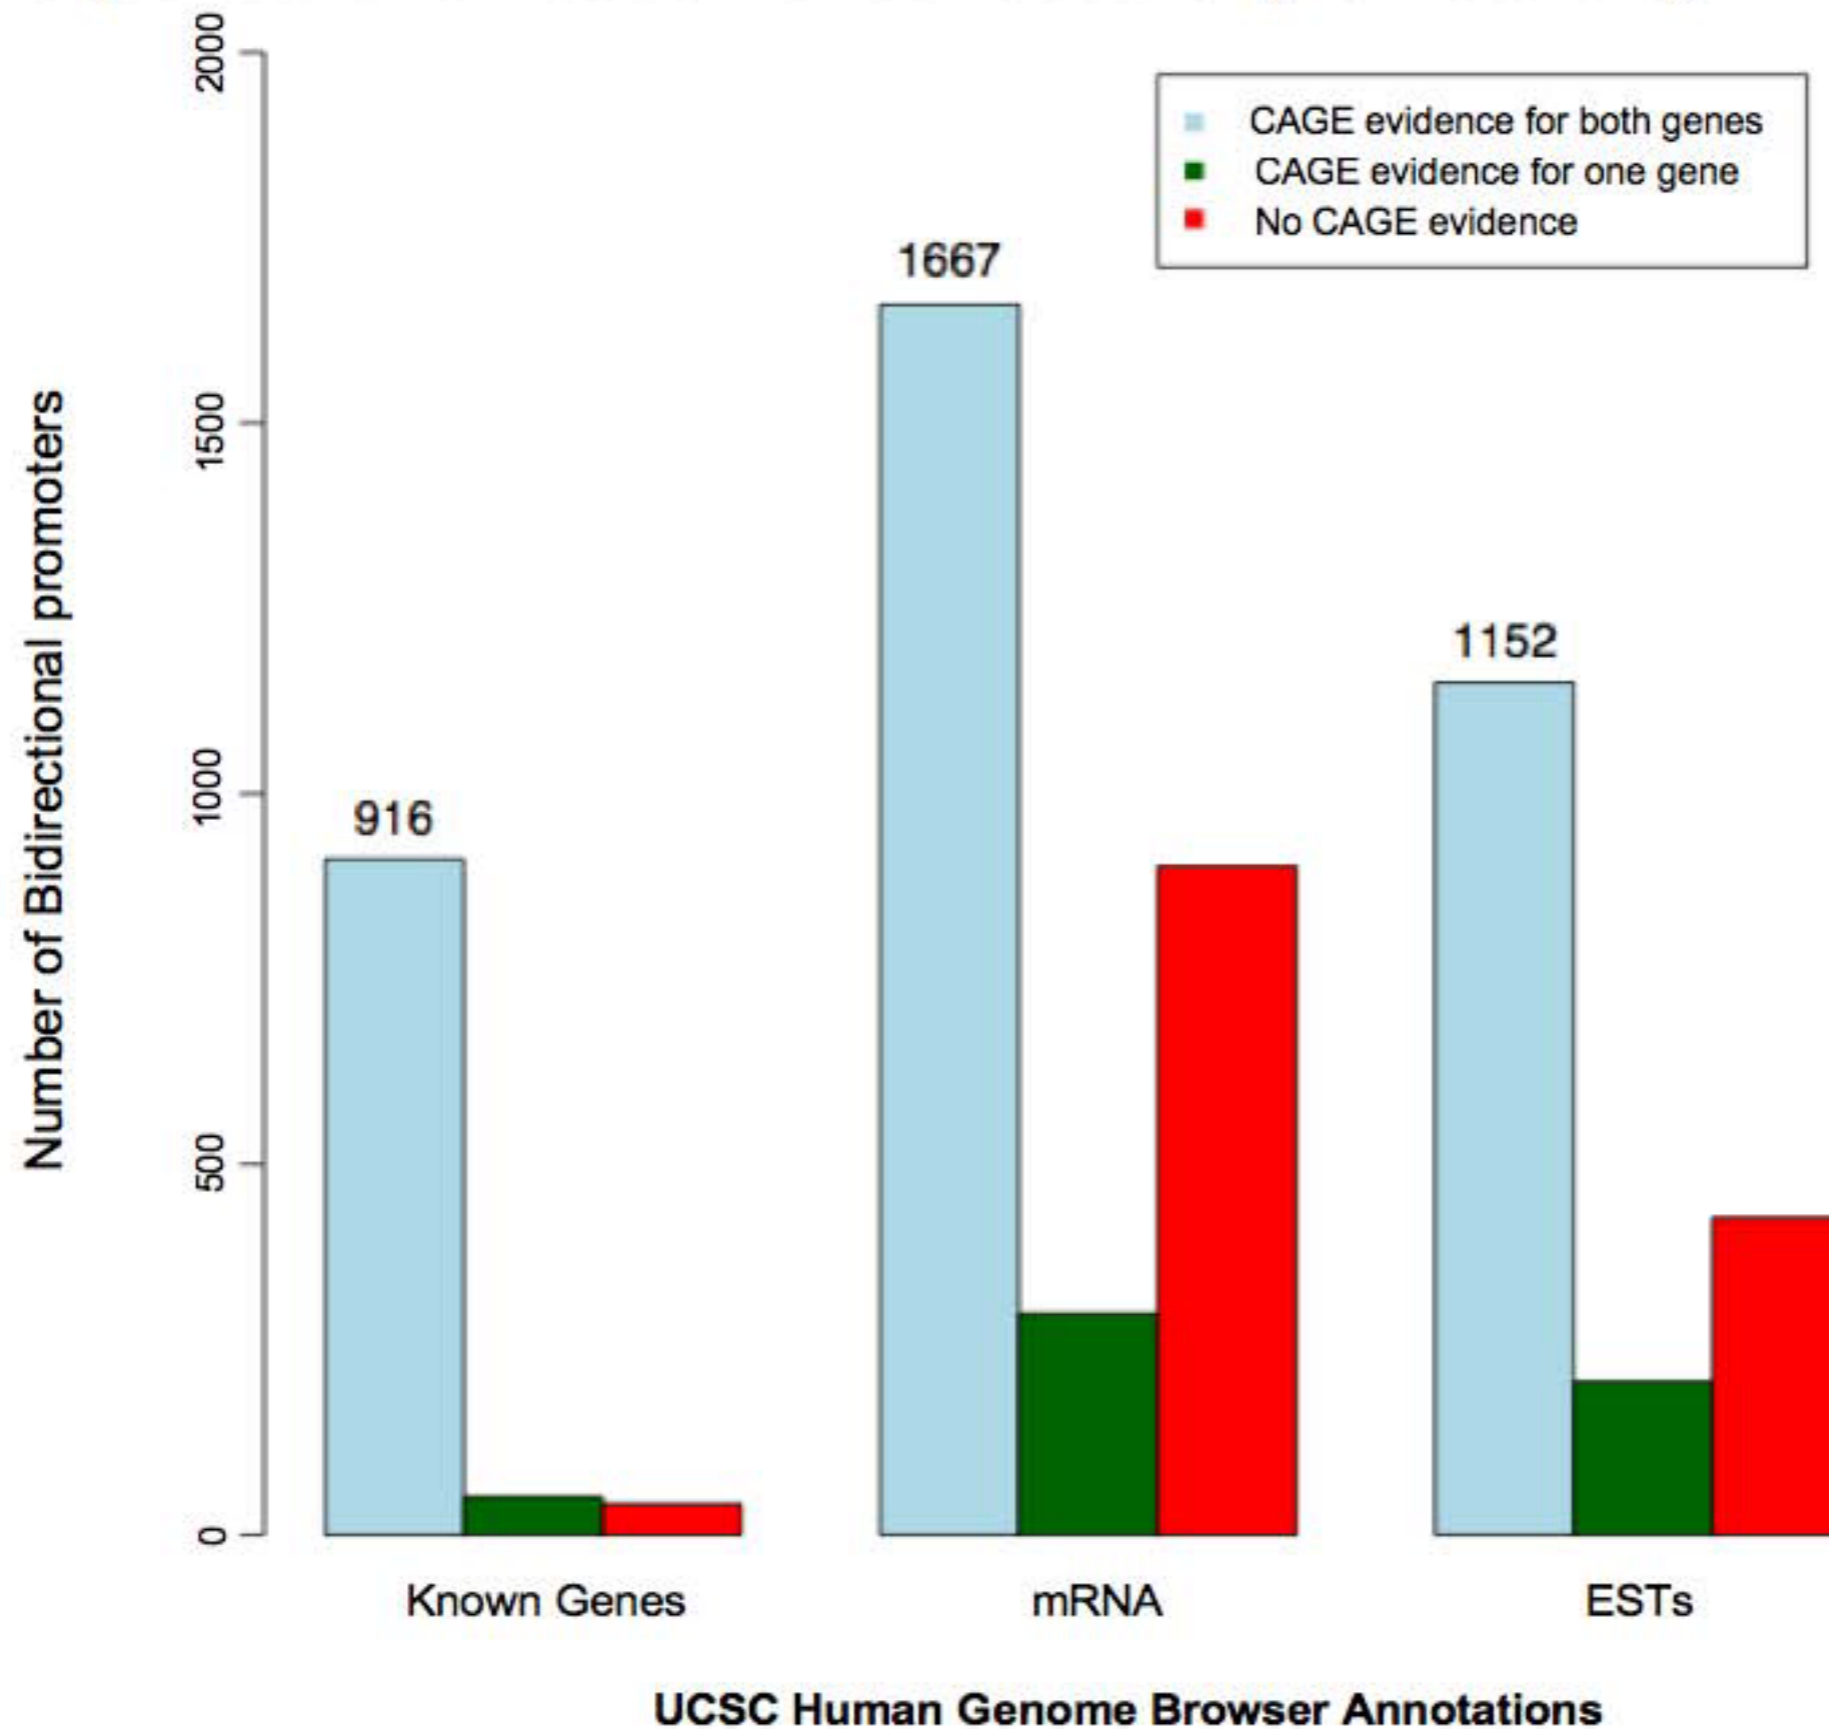

Supplement: S1 (10.1371/journal.pcbi.0030072.s001) [file journal.pcbi.0030072.s001]
